1

2 **Distinct glycerophospholipids potentiate G $\alpha$ -activated adenylyl cyclase activity**

3

4 **Anubha Seth<sup>1\*†</sup>, Marius Landau<sup>2\*</sup>, Andrej Shevchenko<sup>3</sup>, Sofia Traikov<sup>3</sup>, Anita**

5 **Schultz<sup>2</sup>, Sherif Elsabbagh<sup>2</sup>, Joachim E. Schultz<sup>2</sup>**

6

7

8 <sup>1</sup>Max-Planck-Institut für Biologie, Tübingen, Germany

9 <sup>2</sup>Pharmazeutisches Institut der Universität Tübingen, Tübingen, Germany

10 <sup>3</sup>Max-Planck-Institut für molekulare Zellbiologie und Genetik, Dresden, Germany

11

12

13

14

15

16 \*both contributed equally

17 †: present address:

18 Dept. of Pharmacology, Yale University School of Medicine, 333 Cedar Street, New

19 Haven, CT 06520-8066, USA

20

21

22

23 Corresponding author:

24 Dr. Joachim E Schultz

25 Pharmazeutisches Institut der Universität Tübingen,

26 Auf der Morgenstelle 8, 72076 Tübingen, Germany

27 Phone: +49 7071-2972475,

28 Email: [joachim.schultz@uni-tuebingen.de](mailto:joachim.schultz@uni-tuebingen.de)

## 29 **Abstract**

30 Nine mammalian adenylyl cyclases (AC) are pseudoheterodimers with two hexahelical  
31 membrane domains which are isoform-specifically conserved. Previously we proposed that these  
32 membrane domains are orphan receptors (10.7554/eLife.13098; 10.1016/j.cellsig.2020.109538).  
33 The identity of the ligands is unknown. Lipids extracted from fetal bovine serum at pH 1  
34 inhibited mAC activities. Guided by a lipidomic analysis we tested glycerophospholipids as  
35 ligands. Contrary to the effect of the lipid extract we surprisingly discovered that 1-stearoyl-2-  
36 docosahexaenoyl-phosphatidic acid (SDPA) potentiated Gs $\alpha$ -activated activity of human AC  
37 isoform 3 seven-fold. The specificity of fatty acyl esters at position 1 and 2 was rather stringent.  
38 1-Stearoyl-2-docosahexaenoyl-phosphatidylserine and 1-stearoyl-2-docosahexaenoyl-  
39 phosphatidylethanolamine significantly potentiated several Gs $\alpha$ -activated mAC isoforms to  
40 different extents. SDPA does not interact with forskolin activation of AC isoform 3. SDPA  
41 enhanced Gs $\alpha$ -activated AC activities in membranes from mouse brain cortex. The action of  
42 SDPA was reversible. SDPA did not affect isoproterenol-stimulated cAMP generation in  
43 HEK293 cells indicating a role as an intracellular effector. In summary, we discovered a new  
44 dimension of intracellular AC regulation by chemically characterized glycerophospholipids.

45

46

47

48 **Keywords:** adenylyl cyclase / cyclic AMP / membrane anchor / glycerophospholipids /  
49 phosphatidic acid

50

51 **Abbreviations used:** mAC, membrane-delimited adenylyl cyclase; GPL, glycerophospholipid;  
52 SDPA, 1-stearoyl-2-docosahexaenoyl-phosphatidic acid

53

## 54 **Introduction**

55  
56 cAMP is a universal regulator of numerous cellular processes (Dessauer, Watts et al., 2017,  
57 Schultz & Natarajan, 2013, Sinha & Sprang, 2006, Sunahara & Taussig, 2002). Its biosynthesis is  
58 via adenylyl cyclases. This report deals with the nine mammalian, membrane- integrated  
59 pseudoheterodimeric ACs (mACs; reviewed in (Bassler, Schultz et al., 2018, Dessauer et al.,  
60 2017, Ostrom, LaVigne et al., 2022, Schultz & Natarajan, 2013). Currently, a direct regulation of  
61 mACs does not exist. The generally accepted mAC regulation is indirect, i.e. it sequentially  
62 involves (i) the extracellular activation of G-protein-coupled receptors, (ii) intracellular release of  
63 the G $\alpha$  subunit from a trimeric G-protein and, (iii), as a last step mAC activation by the free  $\alpha$ -  
64 subunit (Dessauer et al., 2017, Sadana & Dessauer, 2009). In contrast, we recently have assigned  
65 a direct regulatory role mediated by the membrane domains of the 9 mAC isoforms as receptors  
66 (Beltz, Bassler et al., 2016, Seth, Finkbeiner et al., 2020). In this proposal the mAC receptors are  
67 comprised of the two hexahelical domains each connected to a cytosolic catalytic domain, C1 and  
68 C2, via highly conserved cyclase-transducing-elements (Dessauer et al., 2017, Seth et al., 2020,  
69 Ziegler, Bassler et al., 2017). The proposal for a receptor function is based on (i) the evolutionary  
70 conservation of the membrane anchors in an isoform-specific manner for more than 0.5 billion  
71 years (Bassler et al., 2018), (ii) on highly conserved cyclase-transducing-elements (Ziegler et al.,  
72 2017), and (iii) catalytic domains conserved from cyanobacteria to mammals (Bassler et al.,  
73 2018, Kanacher, Schultz et al., 2002, Linder & Schultz, 2003, Seth et al., 2020). Recently we  
74 reported ligand-mediated inhibition of a G $\alpha$ -activated mAC2 in a chimera in which the AC  
75 membrane domains were replaced by the hexahelical quorum-sensing receptor CqsS from *Vibrio*  
76 *sp.* which has a known ligand, cholera-auto-inducer-1 (Beltz et al., 2016, Ng, Wei et al., 2010,  
77 Seth et al., 2020).

78 In an initial approach to identify ligands for the mAC receptors we used fetal bovine serum (FBS)  
79 which had been shown to contain inhibitory components (Seth et al., 2020). Eliminating peptides  
80 or proteins as possible ligands we fractionated lipids by extraction with chloroform/methanol at  
81 different pH values (Bligh & Dyer, 1959). Expecting to isolate inhibitory components we report  
82 the most surprising discovery that 1-stearoyl-2-docosahexaenoyl-phosphatidic acid (SDPA)  
83 potentiated G $\alpha$ -activated mAC3 activity up to 7-fold. The actions of SDPA resemble, to a  
84 limited extent, those of the plant diterpene forskolin (Dessauer et al., 2017). The data establish a  
85 new layer of direct mAC regulation and emphasize the importance of glycerophospholipids  
86 (GPLs) in regulation of intracellular cAMP generation.

87

88

## 89 **Results**

### 90 **Lipids as possible mAC effectors**

91 We extracted lipids from FBS with chloroform/methanol at pH 1, pH 6, and pH 14 (Bligh &  
92 Dyer, 1959). After evaporation of solvent the solid residue was dissolved in DMSO and tested  
93 against human mAC isoforms 1, 3, 5, 6, and 7 in membrane preparations from HEK293 cells  
94 transfected with the respected ACs. The pH 1 extract inhibited G $\alpha$ -activated mAC activities to  
95 slightly different extents. The pH 6 and pH 14 extracts were not inhibitory (table 1).

96

97

98

99

100

101 **Table 1.**

102 **Lipid Extraction of FBS with Chloroform / Methanol**

103 **remaining Gs $\alpha$  activated AC activity (%)**

104

105

106

107

108

109

|             | <b>pH 14</b> | <b>pH 6</b> | <b>pH 1</b> |
|-------------|--------------|-------------|-------------|
| <b>hAC1</b> | <b>99</b>    | <b>91</b>   | <b>25</b>   |
| <b>hAC2</b> | <b>175</b>   | <b>167</b>  | <b>41</b>   |
| <b>hAC5</b> | <b>96</b>    | <b>112</b>  | <b>44</b>   |
| <b>hAC6</b> | <b>83</b>    | <b>87</b>   | <b>36</b>   |
| <b>hAC7</b> | <b>140</b>   | <b>122</b>  | <b>51</b>   |

110

111

112 2mL FBS were extracted with chloroform/methanol (1:2) according to (Bligh & Dyer, 1959). The

113 organic phase was evaporated and the residue was dissolved in 35  $\mu$ l DMSO. Adenylyl cyclases

114 were activated by 600 nM Gs $\alpha$  and 33 nl of the DMSO extract were added. Basal activities were:

115 0.13, 0.02, 0.04, 0.16, and 0.2 nmol cAMP $\cdot$ mg $^{-1}\cdot$ min $^{-1}$ , respectively. 600 nM Gs $\alpha$ -activated

116 activities were 0.49, 0.36, 2.22, 0.71, and 0.25 nmol cAMP $\cdot$ mg $^{-1}\cdot$ min $^{-1}$ . Values are the mean of

117 two separate experiments.

118

119

120 We then carried out a lipidomic analysis with the pH 1 and the pH 6 fractions (Matyash, Liebisch

121 et al., 2008, Vvedenskaya, Rose et al., 2021). Based on our previous data we expected ligands

122 which inhibit Gs $\alpha$ -activated mAC activities (Seth et al., 2020). Therefore we concentrated on

123 lipids prevalent in the pH 1 fraction. Apart from several constituents from different lipid classes

124 the major constituents in the acidic fraction were phosphatidic acids, phosphatidylcholine,

125 phosphatidylethanolamine and phosphatidylserines (see Appendix Fig. 1 and 2). Next we

126 examined the effect of commercially available bulk lipids on Gs $\alpha$ -activated mACs (Appendix

127 Table 3). Egg phosphatidic acids significantly stimulated, whereas other bulk lipids did not show  
128 unequivocal effects.

129 The lipidomic analysis showed that the unsaturated fatty acids C20:4, arachidonic acid, and  
130 C22:6, docosahexaenoic acid, are prominent acyl substituents in phosphatidic acids (Appendix  
131 Fig. 2). These acyl residues are only minor components in the tested egg phosphatidic acids.  
132 Therefore, we assayed commercially available synthetic GPLs containing polyunsaturated fatty  
133 acids as acyl esters. The general structure of glycerophospholipids is shown below (see Appendix  
134 Table 1 for a complete list of lipids examined in this study).

135

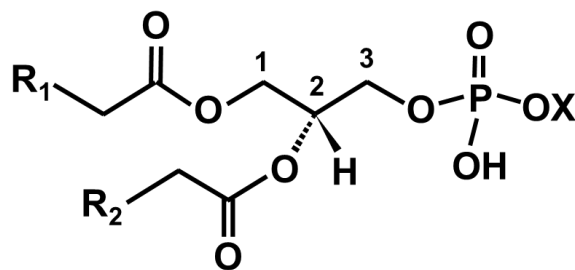

136

137 Basic structure of glycerophospholipids: R<sub>1</sub> and R<sub>2</sub> are fatty acyl residues esterified at glycerol  
138 positions 1 and 2; X can be a proton H<sup>+</sup> as in phosphatidic acid, choline (phosphatidylcholine),  
139 serine (phosphatidylserine), glycerol (phosphatidylglycerol), or ethanolamine  
140 (phosphatidylethanolamine).

141

142

143 The assays used membranes containing human mAC isoforms expressed in HEK293 cells. The  
144 mACs were activated by 600 nM of a constitutively active Gsα (Q227L, here termed Gsα)  
145 because we expected to characterize an inhibitory input (Graziano, Freissmuth et al., 1991, Seth  
146 et al., 2020). Most surprisingly, we discovered that 1-stearoyl-2-docosahexaenoyl-phosphatidic  
147 acid (SDPA) potentiated mAC3 up to 7-fold above the 16-fold activation already exerted by 600  
148 nM Gsα alone (Fig. 1). The EC<sub>50</sub> of SDPA was 0.9 μM. In the absence of Gsα 10 μM SDPA

149 alone had no significant effect (Fig. 1). The effect of SDPA was as far as the synergism between  
150 Gs $\alpha$ -activated mAC3 is concerned reminiscent of the cooperativity between forskolin and Gs $\alpha$   
151 activated mACs (Dessauer et al., 2017).  
152 Does the action of SDPA require a membrane-anchored AC holoenzyme or is the activity of a  
153 Gs $\alpha$ -activated C1/C2 catalytic dimer potentiated as well? We produced a soluble active AC  
154 construct connecting the catalytic C1 domain of mAC1 and the C2 domain of mAC2 by a flexible  
155 linker (Tang & Gilman, 1995). The construct was expressed in *E. coli* and purified via its His<sub>6</sub>-  
156 tag. It was activated 12-fold by Gs $\alpha$  (from 12 to 150 pmol cAMP•mg<sup>-1</sup>•min<sup>-1</sup>). SDPA up to 10  
157  $\mu$ M did not affect basal activity and barely enhanced Gs $\alpha$ -activated activity of the chimera. We  
158 conclude that the SDPA action requires membrane anchoring of mACs.  
159

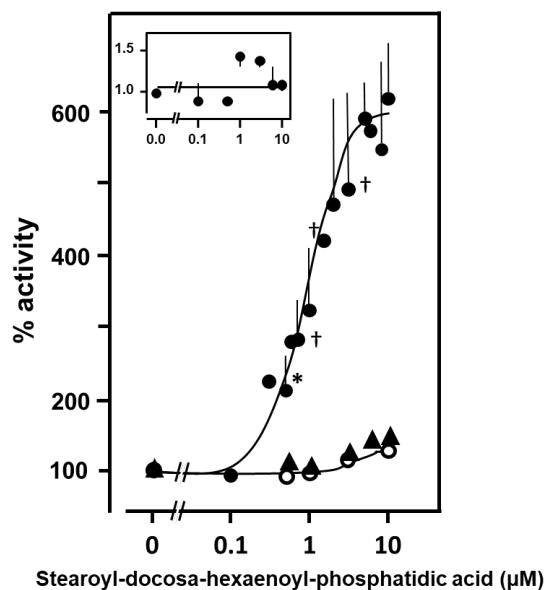

160  
161  
162 **Figure 1.** 1-Stearoyl-2-docosahexaenoyl-phosphatidic acid concentration-dependently potentiates mAC3  
163 activated by 600 nM Gs $\alpha$  (filled circles). 100 % Gs $\alpha$ -activated mAC3 activity corresponded to 707  $\pm$  187  
164 pmoles cAMP•mg<sup>-1</sup>•min<sup>-1</sup>. Basal mAC3 activity is not significantly affected by SDPA (open circles; 100  
165 % basal activity corresponds to 34 pmoles cAMP•mg<sup>-1</sup>•min<sup>-1</sup>). Triangles: Effect of SDPA on the C1-C2  
166 soluble AC construct activated by 600 nM Gs $\alpha$  (Basal activity was 12 pmol cAMP•mg<sup>-1</sup>•min<sup>-1</sup>, 600 nM

167 Gs $\alpha$  activated activity was 150 pmol cAMP•mg<sup>-1</sup>•min<sup>-1</sup> corresponding to 100 %. Insert: Activity of the  
168 mycobacterial AC Rv1625c is unaffected by SDPA (activity was 23 nmoles cAMP•mg<sup>-1</sup>•min<sup>-1</sup>). Data were  
169 normalized to respective 100 % activities. Significances: \*: p<0.05; \*\*: p<0.01 compared to 100%  
170 activity. For clarity, not all significances are marked. N =2-6; error bars denote S.E.M.'s.  
171 Does SDPA affect the activity of a Gs $\alpha$ -insensitive membrane-bound bacterial AC? We used the  
172 mycobacterial AC Rv1625c, a monomeric progenitor of mammalian mACs, which has a  
173 hexahelical membrane domain and is active as a dimer (Guo, Seebacher et al., 2001). The activity  
174 of the Rv1625c holoenzyme was unaffected by SDPA (Fig. 1 insert). The particular intrinsic  
175 properties of the mammalian membrane domains in conjunction with Gs $\alpha$ -activation may be  
176 required to confer SDPA sensitivity.

177 Which kinetic parameters are affected by SDPA? For mAC3, the enzymatic reaction rates  $\pm$   
178 SDPA were linear with respect to protein concentration and time up to 30 min. The Km for  
179 substrate ATP (0.1 mM) was unaffected. The most striking effect of SDPA was the increase in  
180 Vmax (from 4 to 8 nmol cAMP•mg<sup>-1</sup>•min<sup>-1</sup>). Concentration-response curves for Gs $\alpha$  in the  
181 presence of different SDPA concentrations showed that the affinity of mAC3 for Gs $\alpha$  was  
182 significantly increased (Fig. 2). Most likely, Gs $\alpha$  and SDPA act at distinct sites of the protein and  
183 potentiation by SDPA is due to concerted structural interactions, reminiscent of the cooperativity  
184 between Gs $\alpha$  and forskolin (Dessauer et al., 2017).



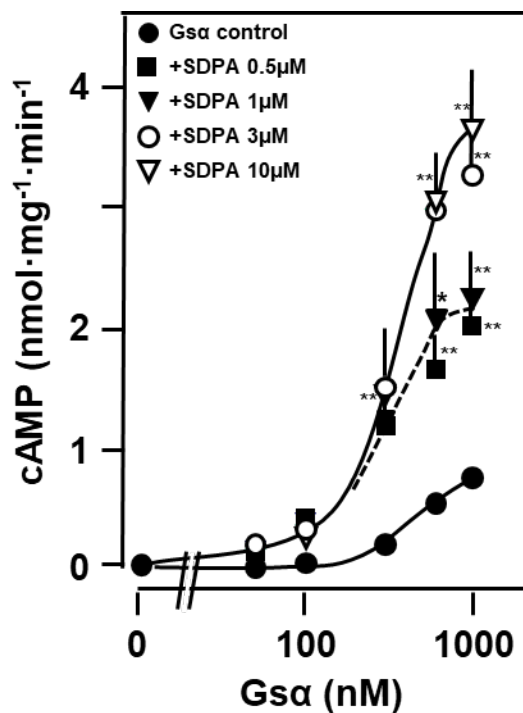

185

186 **Figure 2. SDPA increases the affinity of mAC3 for Gα.** The  $EC_{50}$  concentration for Gα in the  
187 absence of SDPA was 518 nM and in the presence it was  $336 \pm 29$  nM ( $p < 0.02$ ;  $n = 5-6$ ; basal mAC3  
188 activity was  $27 \pm 21$  pmoles  $cAMP \cdot mg^{-1} \cdot min^{-1}$ ; 1000 nM Gα increased mAC3 activity to  $791 \pm 128$   
189 pmoles  $cAMP \cdot mg^{-1} \cdot min^{-1}$ ). Significances: \*:  $p < 0.05$ ; \*\*:  $p < 0.01$  compared to corresponding activities  
190 without SDPA.  $N = 2-6$ ; error bars denote S.E.M.'s. Often, error bars did not exceed the symbol size.

191

192

193

#### 194 **Specificity of 1- and 2-acyl substituents in phosphatidic acid**

195 Phosphatidic acid is the simplest GPL consisting of a glycerol backbone to which two fatty acids  
196 and phosphoric acid are esterified. It potentially carries two negative charges. Generally, at  
197 positions 1 and 2 of glycerol a variety of fatty acyl residues have been identified. We examined  
198 the biochemical specificity of the fatty acyl-groups in phosphatidic acid (Fig. 3).

199

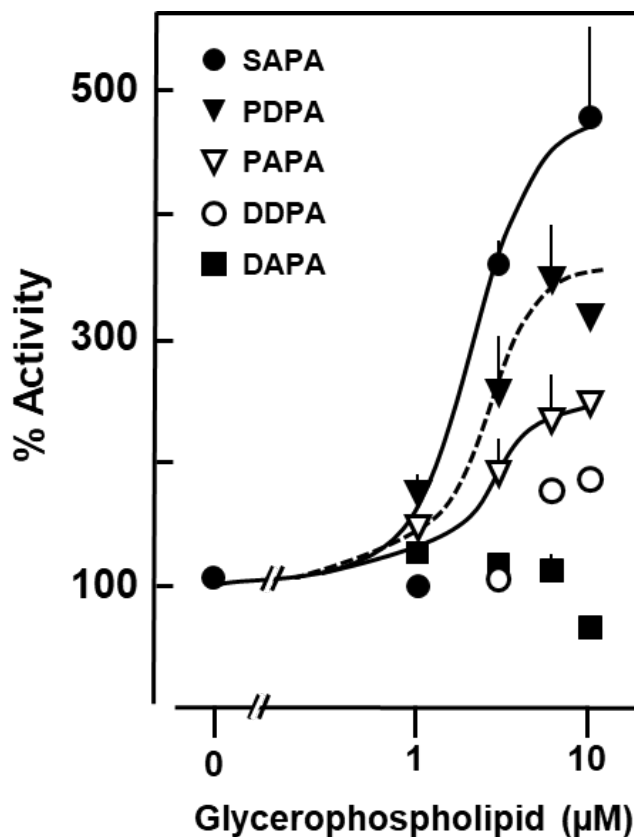

200

201

202 **Figure 3. Specificity of fatty acyl esters in phosphatidic acids for potentiation of G $\alpha$ -activated**  
203 **mAC3.** 600 nM G $\alpha$ -activated activity (100%) was 446 pmol cAMP $\cdot$ mg $^{-1}\cdot$ min $^{-1}$  (basal mAC3 activity was  
204 15.2 pmol cAMP $\cdot$ mg $^{-1}\cdot$ min $^{-1}$ ). Abbreviations: SAPA, 1-stearoyl-2-arachidonoyl-phosphatidic acid; PDPA,  
205 1-palmitoyl-2-docosahexaenoyl-phosphatidic acid; PAPA, 1-palmitoyl-2-arachidonoyl-phosphatidic acid;  
206 DDPA, di-docosahexaenoyl-phosphatidic acid; DAPA, di-arachidonoyl-phosphatidic acid. The EC $_{50}$   
207 concentrations were 4.8, 1.3, and 1.4  $\mu$ M, for SAPA, PDPA, and DDPA, respectively (differences not  
208 significant; n=3). Error bars denote S.E.M..

209

210

211 10  $\mu$ M 1-Stearoyl-2-arachidonoyl-phosphatidic acid (SAPA) potentiated G $\alpha$ -activated mAC3  
212 about 5-fold (EC $_{50}$  = 4.8  $\mu$ M; Fig. 3). Exchanging the stearic acid at position 1 by a palmitic acid,  
213 i.e. 1-palmitoyl-2-docosahexaenoyl-phosphatidic acid (PDPA) reduced biochemical activity by  
214 about 50 % compared to SDPA (EC $_{50}$  = 1.3  $\mu$ M). Strikingly, the corresponding 1-palmitoyl-2-  
215 arachidonoyl-phosphatidic acid (PAPA) lost about 70% of activity compared to SDPA (Fig. 3),

216 highlighting the structural contribution of the 1-fatty acyl residue to biochemical activity. The  
217 importance of the substituent at position 1 was further emphasized when assaying 1, 2-di-  
218 docosahexaenoyl-phosphatidic acid (DDPA). The potency was reduced by 80 % compared to  
219 SDPA (compare respective curves in Fig. 1 and 3). The EC<sub>50</sub> for DDPA was 1.4 μM. Even more  
220 drastic was the absence of an effect using 1, 2-di-arachidonoyl-phosphatidic acid (DAPA; Fig. 3).  
221 Expectedly then, 1-stearoyl-2-linoleoyl-phosphatidic acid was inactive (not shown). The data  
222 show a remarkable positional specificity for the 1- and 2-acyl substituents of the glycerol  
223 backbone and indicate a specific and concerted interaction between the fatty acyl esters. The  
224 specificity of fatty acyl-substitution also strongly indicated that SDPA is not acting in its property  
225 as a general membrane GPL because other phosphatidic acids should be equally suitable as  
226 membrane lipids. Further, the peculiar biochemical properties of SDPA in its relation with AC  
227 isoforms suggest that the negative charges of phosphatidic acid are not sufficient to determine  
228 specificity, but that the lipid substitutions on position 1- as well as 2- probably are equally  
229 important.

230

### 231 **Head group specificity of glycerophospholipids**

232 The next question is whether 1-stearoyl-2-docosahexaenoyl-GPLs with different head groups  
233 might affect Gsα-activated mAC3. First, we replaced the phosphate head group in SDPA by  
234 phosphoserine generating SDPS. This greatly reduced potentiation of Gsα-activated mAC3  
235 activity (2.8-fold potentiation; Fig. 4). A concentration-response curve of SDPS with mAC3  
236 showed that the EC<sub>50</sub> concentration was similar to that of SDPA (1.2 vs 0.9 μM; n=6-9; n.s.), but  
237 its efficacy is significantly lower indicating that identical binding sites are be involved.

238 We further used 1-stearoyl-2-docosahexaenoyl-ethanolamine (SDPE), 1-stearoyl-2-  
239 docosahexaenoyl-phosphatidylglycerol (SDPG) and 1-stearoyl-2-docosahexaenoyl-

240 phosphatidylcholine (SDPC; Fig. 4). In this order, efficacy to enhance the G $\alpha$ -activated mAC3  
241 declined, with SDPC having no significant effect (Fig. 4). The surprising specificity of the 1- and  
242 2-fatty acyl-substituents of the glycerol backbone was emphasized once again when we used 1-  
243 stearyl-2-arachidonoyl-phosphatidyl-ethanolamine (SAPE) and 1-stearyl-2-arachidonoyl-  
244 phosphatidylcholine. In both instances biochemical activity was lost (not shown). Consequently,  
245 we did not further probe GPLs with differing fatty acyl combinations at the glycerol 1- and 2-  
246 positions because, as demonstrated, changes in acyl substitutions resulted in considerable  
247 reduction or loss of biological activity (see Fig 3).

248

249

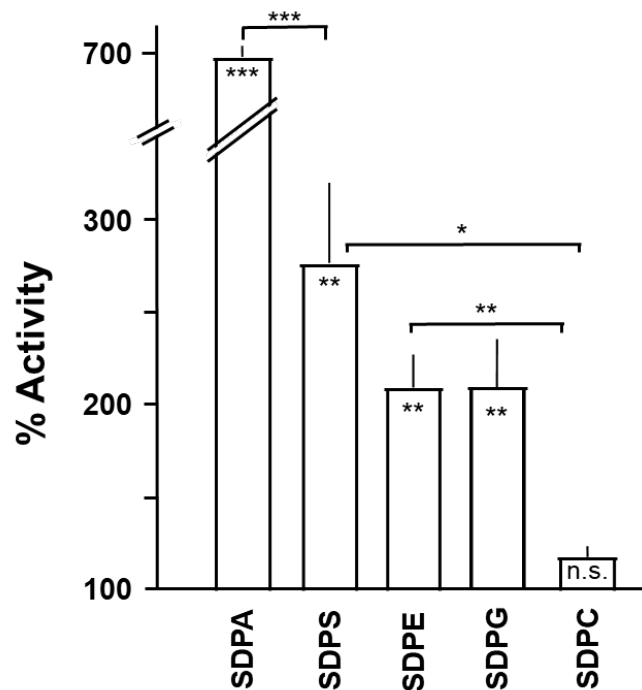

250

251

252 **Figure 4.** Head group specificity of glycerophospholipids enhancing G $\alpha$ -activated mAC3 activity. Basal  
253 and G $\alpha$ -activated mAC3 activities were 0.03 and 0.56 nmol cAMP•mg<sup>-1</sup>•min<sup>-1</sup>. Concentration of lipids was  
254 10  $\mu$ M. Error bars denote S.E.M., \*: p< 0.05; \*\*: p< 0.01; \*\*\*: p<0.001; n = 10.

255  
256  
257  
258  
259  
260  
261  
262  
263  
264  
265

### Effect of glycerophospholipids on G $\alpha$ -activated adenylyl cyclase isoforms

So far, we examined only the mAC3 isoform. Does SDPA equally potentiate the G $\alpha$ -activated activities of the other mAC isoforms? More generally, do GPLs display an mAC isoform specificity in the regulation of intracellular cAMP biosynthesis? We expressed the nine human mAC isoforms in HEK293 and, first, tested how SDPA affected the G $\alpha$ -activated activities (Fig. 5).

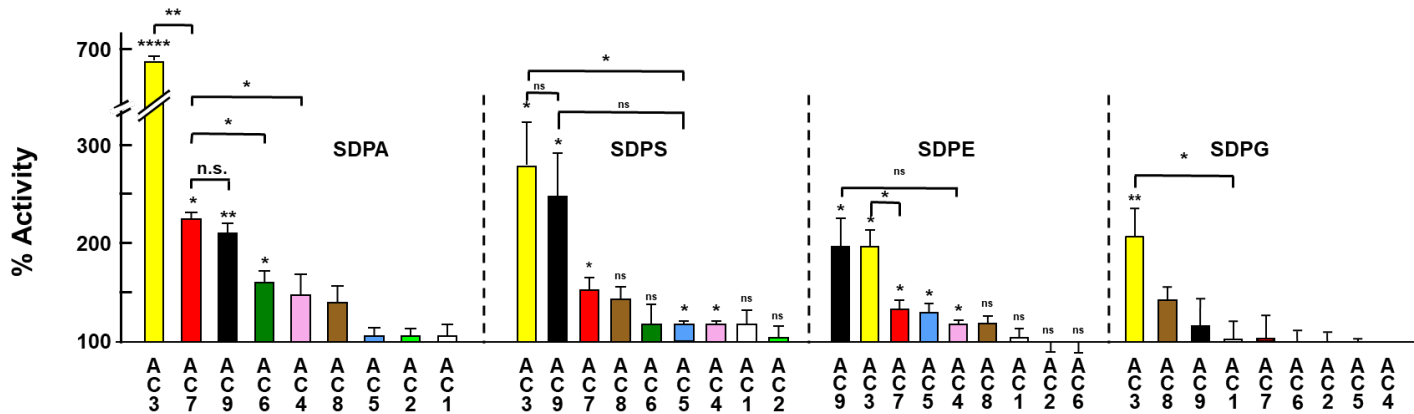

266  
267  
268  
269  
270  
271  
272  
273

**Figure 5. Effect of 10  $\mu$ M of glycerophospholipids on various mAC isoforms activated by 600 nM G $\alpha$ .** Basal activities and G $\alpha$ -activated activities are listed in supplementary Table 2). Error bars denote S.E.M., n = 7-12. \*: p< 0.05; \*\*: p< 0.01; \*\*\*: p<0.001 compared to G $\alpha$ -activated activity.

274 Under identical experimental conditions 10  $\mu$ M SDPA significantly potentiated mAC7 (2.4-fold),  
275 mAC9 (2.1-fold) and mAC6 activities (1.5-fold). Concentration-response curves were carried for  
276 mACs 1, 2, 6, 7 and 9 (Appendix Figure 3). The EC<sub>50</sub> concentrations of SDPA for mAC6, 7 and 9  
277 were 0.7  $\mu$ M, i.e. not significantly different from that for mAC3 indicating equal binding  
278 affinities. The other Gs $\alpha$ -activated mAC isoforms were not significantly affected (Fig. 5 and  
279 Appendix Figure 3). In summary, the data demonstrated that the mAC isoform specificity of  
280 SDPA was not absolutely stringent. The data then pose the question whether other GPLs may  
281 exert similar effects on mAC activities or display a different panel of isoform specificity. This  
282 was investigated using another four stearyl-2-docosahexaenoyl-GPLs (Fig. 5). 10  $\mu$ M SDPS  
283 potentiated mAC3 and mAC9. Smaller, yet significant effects were measured with mACs 7, 8, 5,  
284 and 6 (Fig. 5). 10  $\mu$ M SDPE significantly potentiated Gs $\alpha$ -activated mAC isoforms 9, 3, 7, 5, and  
285 4 (in this order). 10  $\mu$ M SDPG significantly enhanced only mAC3 activity (Fig. 5). Compared to  
286 the seven-fold effect of SDPA on mAC3 these effects were small, yet, in mammalian biology  
287 such enhancements in mAC activity may well have profound physiological consequences. Up to  
288 20  $\mu$ M SDPC which is a major constituent of the outer leaflet of membranes had no effect on any  
289 mAC isoform (not shown). Taken together, the data then demonstrate the capacity of chemically  
290 defined GPLs to enhance or potentiate the activation of Gs $\alpha$ -activated mACs. We can virtually  
291 exclude coincidental and unspecific effects of the amphiphilic phospholipids because mAC  
292 isoforms were affected differentially. The results strongly indicate that a defined conformational  
293 space must exist at mACs which allows specific interactions with GPLs. Presently, the molecular  
294 details of the binding mode remain unknown.

### 295 **Relationship between SDPA and forskolin**

296 SDPA failed to activate basal mAC3 activity and only potentiates Gs $\alpha$ -activated mAC3 activity  
297 (Fig. 1). The plant diterpene forskolin stimulates basal as well as Gs $\alpha$ -activated mAC activities

298 (Dessauer et al., 2017, Tesmer, Sunahara et al., 1997, Zhang, Liu et al., 1997), i.e. the effects of  
299 SDPA and forskolin are only partly similar. Forskolin stimulates mACs expressed in Sf9 cells to  
300 rather different extents and with discrepant potencies, e.g. the EC<sub>50</sub> concentrations for AC1 (0.7  
301 μM) and AC2 (8.7 μM) differ more than 12-fold (Pinto, Papa et al., 2008). We established  
302 forskolin concentration-response curves for all mAC isoforms expressed in HEK293 cells under  
303 identical experimental conditions using Mg<sup>2+</sup> as divalent cation, a study which is lacking so far  
304 (Appendix figure 4).

305 Stimulations at 1 mM forskolin were between 3-fold for mAC1 and remarkable 42-fold for  
306 mAC3. The EC<sub>50</sub> concentrations for stimulation of basal mAC activities ranged from 2 to 512  
307 μM forskolin (mAC7; Appendix Figure 4). We also observed forskolin activation of mAC9  
308 although the current consensus regarding this isoform is that it is forskolin insensitive. The latter  
309 conclusion is based on experiments with mAC9 expressed in insect Sf9 cells using Mn<sup>2+</sup> as a  
310 cation (Dessauer et al., 2017). Another report described forskolin activation of mAC9 when  
311 expressed in HEK293 (Premont, Matsuoka et al., 1996), in line with our data (Appendix Figure  
312 4). We examined potential interactions between forskolin and SDPA using mAC3 activated by  
313 600 nM Gsα. Up to 10 μM SDPA did not significantly affect forskolin stimulation. We reason  
314 that the absence of interactions or cooperativity between forskolin and SDPA indicates that both  
315 agents affect mAC regions which exclude mutual cooperative interactions. Nevertheless,  
316 considering the structural dissimilarity of forskolin and SDPA and the obvious lack of a  
317 molecular fit an identical binding site for both lipophilic agents is rather unlikely. On the other  
318 hand, both agents do interact with distantly-binding Gsα in a cooperative manner.

319

320 **SDPA enhances Gsα-stimulated cAMP formation in mouse brain cortical**  
321 **membranes**

322 Above we tested GPLs with individual mAC isoforms. At this point the question is whether  
323 SDPA would potentiate mAC activity in membranes isolated from mammalian organs. Several  
324 mAC isoforms are expressed in any given tissue and cell, yet the ratios of isoform expression  
325 differ. In mouse brain cortex all mAC isoforms with the exception of mAC4 are expressed  
326 (Ludwig & Seuwen, 2002, Sanabra & Mengod, 2011). Depending on the expression ratios we  
327 might expect at least a moderate potentiation of the G $\alpha$ -activated AC activity by SDPA. In  
328 mouse cortical membranes the basal AC activity of 0.3 nmoles cAMP $\cdot$ mg $^{-1}$  $\cdot$ min $^{-1}$  was unaffected  
329 by 10  $\mu$ M SDPA (Fig. 6A). 600 nM G $\alpha$  stimulated AC activity 20-fold (7.9 nmoles cAMP $\cdot$ mg $^{-1}$   
330  $\cdot$ min $^{-1}$ ) and this was further enhanced 1.7-fold by 10  $\mu$ M SDPA (13.4 nmoles cAMP $\cdot$ mg $^{-1}$  $\cdot$ min $^{-1}$ ).  
331 An SDPA concentration-response curve yielded an EC $_{50}$  of 1.2  $\mu$ M, i.e. similar to those  
332 established in HEK293-expressed mAC isoforms (Fig. 6A; compare to Fig. 1 and Appendix  
333 figure 3). The data demonstrated that the SDPA effect of GPLs on mAC activities was not due to  
334 peculiar membrane properties of the cultured HEK293 cells and supported the suggestion that the  
335 effects of GPLs are of more general physiological relevance.

336



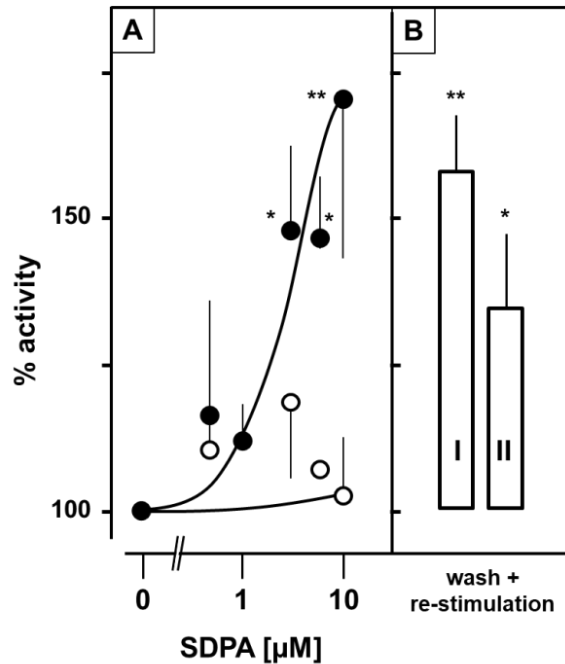

337

338

339 **Figure 6. 1-Stearoyl-2-docosahexaenoyl-phosphatidic acid concentration-dependently potentiates**

340 **Gα activated adenylyl cyclase activity in brain cortical membranes from mouse.** (A) 600 nM Gα

341 was used to activate mACs in cortical membranes (solid circles: 100 % Gα-activated activity is  $7.9 \pm 1.9$

342  $\text{nmol cAMP}\cdot\text{mg}^{-1}\cdot\text{min}^{-1}$ ); open circles: basal activity (in absence of Gα) is  $0.3 \pm 0.2 \text{ nmol cAMP}\cdot\text{mg}^{-1}\cdot\text{min}^{-1}$ . n = 6. (B) Reversibility of SDPA action. Cortical brain membranes were incubated for 15 min

343  $1\cdot\text{min}^{-1}$ . n = 6. (B) Reversibility of SDPA action. Cortical brain membranes were incubated for 15 min

344 without (I) and with (II) 10 μM SDPA. Membranes were then collected by centrifugation, and re-assayed.

345 I: control membranes + 600 nM Gα + 10 μM SDPA; II: membranes incubated with 10 μM SDPA,

346 collected and re-assayed with 600 nM Gα + 10 μM SDPA. Error bars denote S.E.M., \*:  $p < 0.05$ ; \*\*:  $p <$

347  $0.01$  (n=6).

348 The next question was whether SDPA acts directly from the extracellular site via the membrane-

349 receptor domain of mAC3 or is a cytosolic effector. We used HEK293 cells transfected with

350 mAC3. 10 μM isoproterenol increased cAMP levels from 0.8 to 2.2 pmol/mg within 15 min.

351 SDPA up 50 μM did not affect the isoproterenol stimulation (data not shown). These unequivocal

352 data virtually excluded that SDPA acted via extracellular binding sites (receptors) or via an  
353 efficient and rapid uptake system. The data indicated a cytosolic site for the action of GPLs.

354

### 355 **Is SDPA a ligand?**

356 GPLs are common building blocks of cell membranes. The major constituents of the inner leaflet  
357 are phosphatidylserines and phosphatidylethanolamines, whereas the predominant lipids of the  
358 outer leaflet are phosphatidylcholine and sphingomyelin. Phosphatidic acids are indispensable,  
359 yet minor membrane components (Kooijman & Burger, 2009). The potentiation by SDPA of  
360 Gs $\alpha$ -activated mAC3 could be due to a lack of SDPA in the vicinity of the membrane-imbedded  
361 mACs. Added SDPA might be incorporated into the membrane or inserted into hydrophobic  
362 pockets of mACs resulting in an irreversible reordering of mAC domains. Alternatively, SDPA  
363 may bind reversibly to the cyclase in a transient manner. Under these latter circumstances the  
364 biochemical effect should be reversible. Using mouse cortical brain membranes, we attempted to  
365 dissect these possibilities. We incubated membranes for 15 min at 37°C with 10  $\mu$ M SDPA. The  
366 membranes were then collected at 100,000 g and washed once. The pre-treated membranes were  
367 susceptible to Gs $\alpha$  stimulation and concomitant potentiation by SDPA like naïve cortical  
368 membranes (Fig. 6B). Furthermore, the supernatant of a 50  $\mu$ M SDPA preincubation was used to  
369 potentiate the Gs $\alpha$  activation in naïve membranes, i.e. SDPA was not significantly incorporated  
370 into the membrane preparation. The data support the notion that SDPA, and most likely other  
371 GPLs, serve as intracellular regulatory effectors for cellular mACs.

### 372 **Discussion**

373 Our results were contrary to the hypothesis at the outset because we expected to find an mAC  
374 inhibitory input. Most surprisingly we identified SDPA and other GPLs as positive effectors of

375 mAC activities. Obviously, we have discovered a new system of intracellular mAC regulation. At  
376 this state our findings open more questions than can be answered with this initial report.  
377 We used HEK293 cells permanently transfected with mACs. HEK293 cells express considerable  
378 endogenous AC3 and 6 activities (Soto-Velasquez, Hayes et al., 2018). These endogenous mAC  
379 activities appear to be negligible in this context. First, upon transfection of mAC isoforms we  
380 observed very different basal AC activities virtually excluding that ‘contaminating’ endogenous  
381 AC activities affected our results (see Appendix Table 2 for a list of basal activities in transfected  
382 HEK293 cells). Second, we tested HEK293 cells in which mACs 3 and 6 were knocked out  
383 (Soto-Velasquez et al., 2018). Upon mAC3 transfection SDPA similarly potentiated Gs $\alpha$ -  
384 activated mAC3 activity. Because these engineered cells proliferated rather slowly they were not  
385 used routinely.

386 Diacylglycerols’ and PA are lipid second messengers that regulate physiological and pathological  
387 processes, e.g. phosphatidic acids were reported to effect ion channel regulation and SDPA to act  
388 on the serotonin transporter in the brain (Lu, Murakami et al., 2020, Robinson, Rohacs et al.,  
389 2019). So far, the specificity of fatty acyl residues and head groups in these lipids was not  
390 explored. Here, we observed a striking exclusivity of fatty-acyl esters at positions 1- and 2- of the  
391 glycerol backbone supporting a specific effector-mAC interaction. Usually fatty acyl  
392 substitutions are regulated because they impart specific biophysical and biochemical properties  
393 (Hishikawa, Valentine et al., 2017). We demonstrated that the combined fatty acyl ligands 1-  
394 stearyl-2-docosahexaenoyl are more or less exclusive for the actions of SDPA. Even seemingly  
395 minor changes caused substantial changes in activity and efficacy, e.g. a change from stearyl to  
396 palmitoyl at glycerol position 1 (Fig. 3). This argues for a cooperative interaction between the  
397 stearyl- and docosahexaenoyl carbon chains. Apparently, such interactions are substantially  
398 diminished when only one of the two acyl residues is altered. Notably, di-docosahexaenoyl- and

399 di-arachidonoyl-phosphatidic acids (DDPA and DAPA) had mostly lost the capability to promote  
400 AC3 activity (Fig. 3). A particularly interesting point is the preference for 2-docosahexaenoyl  
401 acylation in the GPLs. Docosahexaenoic acid is an essential omega-3 fatty acid that cannot be  
402 synthesized by humans. It is part of a balanced diet and sold as a nutraceutical. A specific  
403 transporter for uptake of this fatty acid, packaged as a lysophosphatidic acid, has been thoroughly  
404 studied (Cater, Chua et al., 2021, Nguyen, Ma et al., 2014). Docosahexaenoic acid is needed for  
405 normal brain development and cognitive functions, a role in depression and Alzheimer's disease  
406 is discussed (Duan, Song et al., 2021, Heras-Sandoval, Pedraza-Chaverri et al., 2016, Nguyen et  
407 al., 2014, Zhu, Tan et al., 2015). So far, mACs have not yet been noticed in metabolic  
408 disturbances caused by a lack of docosahexaenoic acid. The data presented here provides  
409 evidence that docosahexaenoic acid stimulates the cAMP generating system.

410

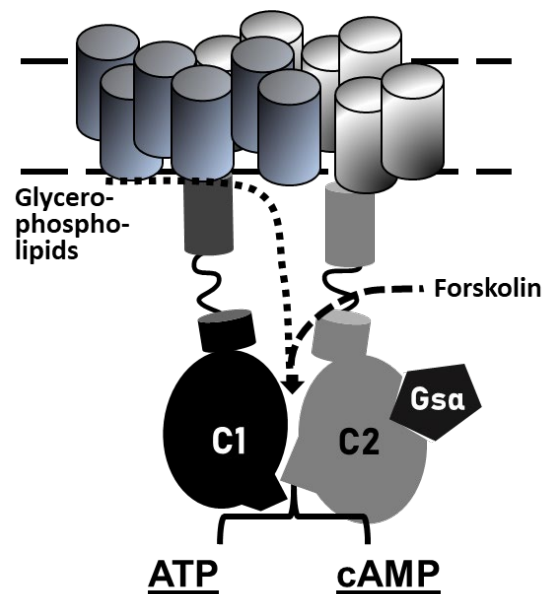

411

412 **Figure 7.** Scheme of a 2X6<sup>TM</sup>-adenylyl cyclase with regulatory input from G $\alpha$ , binding to the  
413 C2 catalytic domain, forskolin, binding to a degenerated second substrate-binding site (Guo et al.,

414 2001, Tesmer & Sprang, 1998), and glycerophospholipids, here proposed to enter and bind at the  
415 membrane anchor-receptor and extending towards the catalytic dimer.

416  
417 Examination of head group specificity displayed different patterns of mAC susceptibility and  
418 activity (Fig. 5). Notably, mAC isoforms 1 and 2 were not significantly affected by any of the  
419 GPLs assayed. This may be due to a general insensitivity for GPLs or that we did not identify the  
420 suitable bioactive GPLs. We did not examine the specificity of acyl substitution at the glycerol  
421 backbone in SDPS, SDPE, SDPG and SDPC because of the specificity of the stearic-  
422 /docosahexaenoic acid couple in SDPA. We tested 1-stearoyl-2-arachidonoyl-phosphatidyl  
423 choline and the corresponding phosphatidyl-ethanolamine. Biological activity was absent with  
424 mACs 3, 5, 7, and 9, bolstering the assertion that fatty acyl specificity is stringent in these GPLs  
425 as well. Presently we cannot completely exclude that GPLs acylated by different couples of acid  
426 substituents at the 1- and 2-positions might possess equal or better effector properties. In view of  
427 the large variety of GPLs this cannot be tested with a reasonable effort. Currently, we consider  
428 such a possibility as remote. We do not know how GPL's mechanistically potentiate AC activity  
429 in a synergistic interaction together with  $G_{\alpha}$ . The scheme in Fig. 7 is intended to illustrate an  
430 approximation of the potential interaction sites in relation to  $G_{\alpha}$  and forskolin (see below).

431 Another question which is not answered in this study concerns the intracellular origin of GPLs,  
432 how their biosynthesis and release is regulated and tied into the cAMP regulatory system. Despite  
433 being water insoluble, an efficient traffic of phospholipids in cells exists, e.g. between locations  
434 of uptake and biosynthesis, to and from low-density-, high-density- and very low density  
435 lipoproteins, and the diversity of membrane-enclosed organelles such as mitochondria, nucleus,  
436 endoplasmic reticulum, endosomes, lysosomes, and the plasma membrane itself. Thus, lipid  
437 trafficking is a permanent cellular process connected to diverse signaling systems (Hishikawa et

438 al., 2017). Part of the biosynthetic pathways for phosphatidic acid is the hydrolysis of GPLs with  
439 choline, ethanolamine or serine as headgroups by phospholipase D which generates phosphatidic  
440 acids. (Jang, Lee et al., 2012). Chemically, GPLs are excellently suited to serve as mAC effectors  
441 because termination of SDPA signaling is easily accomplished by phospholipase C. The  
442 relationship between SDPA and forskolin is debatable. The agents do not cooperatively interact  
443 at mAC proteins. Certainly, the structural changes caused by either agent promote the interactions  
444 between AC and G $\alpha$ . Yet this is no proof that such changes are identical or even similar.  
445 A critical observation was the potentiation by SDPA of G $\alpha$ -activated mAC activity in mouse  
446 brain cortical membranes. mAC3 has been reported to be abundantly expressed in brain (Ludwig  
447 & Seuwen, 2002, Sanabra & Mengod, 2011). The efficacy of SDPA was comparable to that  
448 determined in mAC3-HEK293 membranes. This demonstrated that the effect of GPLs observed  
449 in HEK293 expressed AC isoforms is of physiological significance. Our approach has then  
450 discovered intracellular processes which in conjunction with the established canonical  
451 GPCR/G $\alpha$ -regulation of mACs add a new dimension of mAC regulation. Currently, we cannot  
452 exclude the possibility that other GPLs exist which have an inhibitory input. Actually,  
453 thermodynamic considerations would argue in favor of such a possibility. Whether this is realized  
454 as a biological mechanism remains an open possibility. Presently, many important questions  
455 remain unanswered, such as how are intracellular GPL levels regulated, which of the intracellular  
456 GPLs have access to the membrane-delimited ACs, are GPL concentrations persistently or  
457 acutely adjusted in a cell, e.g. by stress, diet, diurnal or seasonal effects or by peculiar disease  
458 states? In other word, are we dealing with a long-term regulation of the G $\alpha$ -sensitivity of the  
459 cAMP generating system or with coordinated short term signaling events? Answering these  
460 medically relevant questions remains a formidable challenge in the future.

461

## 462 **Materials and methods**

463 The genes of the human AC isoforms 1 – 9 cloned into the expression plasmid pcDNA3.1+/C-  
464 (K)-DYK were purchased from GenScript and contained a C-terminal flag-tag. Creatine kinase  
465 was purchased from Sigma, restriction enzymes from New England Biolabs or Roche Molecular.  
466 All chemicals were from Avanti Lipids and Sigma-Merck. The constitutively active Gs $\alpha$ Q227L  
467 point mutant was expressed and purified as described earlier (Diel, Klass et al., 2006, Graziano,  
468 Freissmuth et al., 1989, Graziano et al., 1991). Forskolin was a gift from Hoechst, Frankfurt,  
469 Germany. Human serum (catalog # 4522 from human male AB plasma) and fetal bovine serum  
470 were from Gibco, Life Technologies, Darmstadt, Germany (catalog #: 10270; lot number:  
471 42Q8269K).

## 472 **Plasmid construction and Protein Expression**

473 ACIC1\_ACIIC2 was generated in pQE60 with NcoI/HindIII restrictions sites according to Tang  
474 et al. (Tang & Gilman, 1995). The construct boundaries were: MRGSH<sub>6</sub>-HA-hAC1-C1<sub>M268-R482</sub>-  
475 AAAGGMPPAAAGGM -hAC2-C2<sub>R822-S1091</sub>. HEK293 cells were maintained in Dulbecco's  
476 modified Eagle's medium (DMEM) containing 10% fetal bovine serum at 37°C with 5% CO<sub>2</sub>.  
477 Transfection of HEK293 cells with single mAC plasmids was with PolyJet (SignaGen, Frederick,  
478 MD, USA). Permanent cell lines were generated by selection for 7 days with G418 (600  $\mu$ g/mL)  
479 and maintained with 300  $\mu$ g/mL G418 (Baldwin, Li et al., 2019, Cumbay & Watts, 2004, Soto-  
480 Velasquez et al., 2018). For membrane preparation cells were tyrosinized and collected by  
481 centrifugation (3,000xg, 5 min). Cells were lysed and homogenized in 20 mM HEPES, pH 7.5, 1  
482 mM EDTA, 2 mM MgCl<sub>2</sub>, 1 mM DTT, and one tablet of cOmplete, EDTA-free ( for 50 mL), 250  
483 mM sucrose by 20 strokes in a potter homogenizer. Debris was removed by centrifugation for 5  
484 min at 1,000 x g, membranes were then collected by centrifugation at 100,000 x g for 60 min at

485 0°C, resuspended and stored at -80°C in 20 mM MOPS, pH 7.5, 0.5 mM EDTA, 2 mM MgCl<sub>2</sub>.

486 Expression was checked by Western blotting.

487 Membrane preparation from mouse brain cortex was according to (Schultz & Schmidt, 1987,

488 Seth et al., 2020).

### 489 **Adenylyl cyclase assay**

490 AC activities were determined in a volume of 10 µl using 1 mM ATP, 2 mM MgCl<sub>2</sub>, 3 mM

491 creatine phosphate, 60 µg/ml creatine kinase, 50 mM MOPS, pH 7.5 using cAMP assay kit from

492 Cisbio (Codolet, France) according to the supplier's instructions. For each assay a cAMP

493 standard curve was established (Seth et al., 2020). Lipids were dissolved in 100% ethanol or

494 DMSO at high concentrations and acutely diluted in 20 mM MOPS pH 7.5 at concentrations

495 which limited organic solvent in the assay at maximally 1%.

### 496 **Lipidomic analysis**

497 Lipids were extracted from MonoQ purified aqueous fractions by methyl-*tert*-butyl ether /

498 methanol as described (Matyash et al., 2008) after adjusting their pH to 1.0 and 6.0, respectively.

499 The collected extracts were dried under vacuum, and re-dissolved in 500µl of water / acetonitrile

500 1:1 (v/v). Lipids were analyzed by LC-MS/MS on a Xevo G2-S QToF (Waters) mass

501 spectrometer interfaced to Agilent 1200 liquid chromatograph. Lipids were separated on a

502 Cortecs C18 2.7 µm beads; 2.1 mm ID x 100 mm (Waters) using a mobile phase gradient: solvent

503 A: 50% aqueous acetonitrile; solvent B: 25% of acetonitrile in isopropanol; both A and B

504 contained 0.1% formic acid (v/v) and 10 mM ammonium formate. The linear gradient was

505 delivered with flow rate of 300 µl /min in 0 min to 12 min from 20% to 100 % B; from 12 min to

506 17 min maintained at 100% B, and from 17 min to 25min at 20% B. Mass spectra were acquired

507 within the range of *m/z* 50 to *m/z* 1200 at the mass resolution of 20 000 (FWHM). The

508 chromatogram was searched against web-accessible XCMS compound database at



509 [https://xcmsonline.scripps.edu/landing\\_page.php?pgcontent=mainPage](https://xcmsonline.scripps.edu/landing_page.php?pgcontent=mainPage). Lipids were quantified  
510 using Skyline 21.1.0.278 software using synthetic lipid standards (Vvedenskaya et al., 2021)  
511 spiked into the analyzed fractions prior lipid extraction.

512

### 513 **Data analysis and statistical analysis**

514 All incubations were in duplicates or triplicates. Usually, S.E.M values are given. Data analysis  
515 was with GraphPad prism 8.1.2.

516

517 **Supplemental Material**

518

519 **Appendix Figure 1**

520

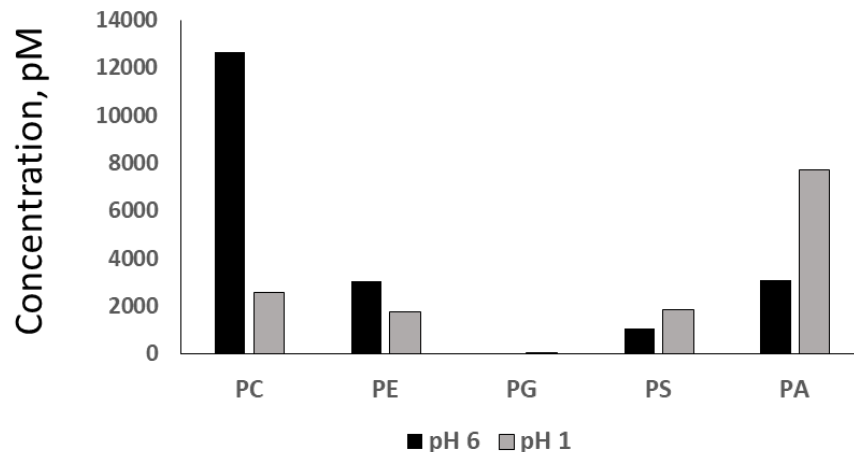

521

522

523 Lipid class composition of MTBE / methanol extracts. MonoQ-purified fractions were extracted  
524 at pH 1.0 and pH 6.0. Expectantly, the extract recovered under acidic conditions was enriched  
525 with PA. Y-axis: total abundance of lipid classes, pmol/L (n=2)

526

527 **Appendix Figure 2**

528

529

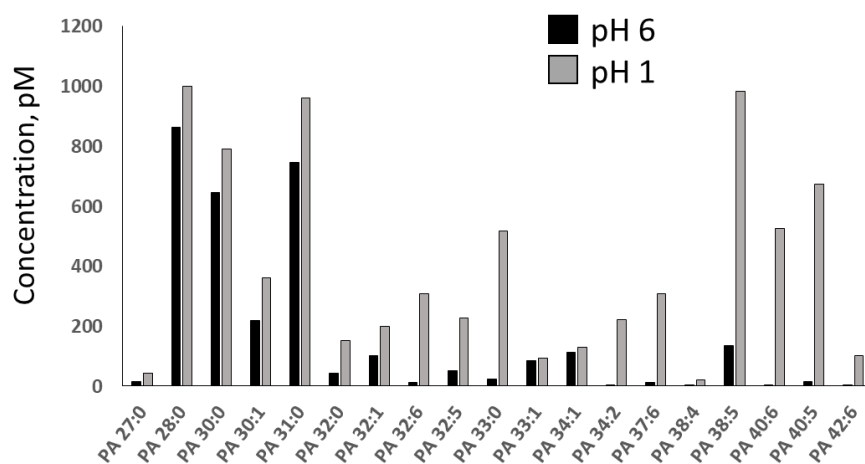

530

531

532 Molecular composition of PA species extracted by MTBE / methanol from the fractions with pH  
533 6.0 and pH 1.0. Acidic extraction increased the recovery of PA by more than 2-fold and also  
534 enriched the extract with the molecular species comprising long polyunsaturated fatty acid  
535 moieties. Y-axes: molar abundance of lipid species, in pmol/L (n=2)

536 Appendix Table 1:

537

538 List of lipids tested:

539

540 from Avanti lipids:

541

- 542 • 131303P Cerebrosides
- 543 • 131305P Sulfatides
- 544 • 800818C 1-stearoyl-2-arachidonoyl-sn-glycerol
- 545 • 800819 --stearoyl-2-docosahexaenoyl-sn-glycerol
- 546 • 830855C 1,2-dipalmitoyl-sn-glycero-3-phosphate
- 547 • 840051P L- $\alpha$ -phosphatidylcholine (Egg, Chicken)
- 548 • 840055C L- $\alpha$ -phosphatidylcholine (Liver, Bovine)
- 549 • 840065C 1-stearoyl-2-docosahexaenoyl-sn-glycero-3-phospho-L-serine
- 550 • 840101C L- $\alpha$ -phosphatidic acid (Egg, Chicken) (sodium salt)
- 551 • 840859C 1-palmitoyl-2-arachidonoyl-sn-glycero-3-phosphate (sodium salt)
- 552 • 840860C 1-palmitoyl-2-docosahexaenoyl-sn-glycero-3-phosphate (sodium salt)
- 553 • 840862C 1-stearoyl-2-linoleoyl-sn-glycero-3-phosphate (sodium salt)
- 554 • 840863C 1-stearoyl-2-arachidonoyl-sn-glycero-3-phosphate (sodium salt)
- 555 • 840864C 1-stearoyl-2-docosahexaenoyl-sn-glycero-3-phosphate (sodium salt)
- 556 • 840875C 1,2-dioleoyl-sn-glycero-3-phosphate (sodium salt)
- 557 • 840885C 1,2-dilinoeoyl-sn-glycero-3-phosphate (sodium salt)
- 558 • 840886C 1,2-diarachidonoyl-sn-glycero-3-phosphate (sodium salt)
- 559 • 840887C 1,2-didocosahexaenoyl-sn-glycero-3-phosphate (sodium salt)
- 560 • 850469C 1-stearoyl-2-arachidonoyl-sn-glycero-3-phosphocholine
- 561 • 850472C 1-stearoyl-2-docosahexaenoyl-sn-glycero-3-phosphocholine
- 562 • 850804C 1-stearoyl-2-arachidonoyl-sn-glycero-3-phosphoethanolamine
- 563 • 850806C 1-stearoyl-2-docosahexaenoyl-sn-glycero-3-phosphoethanolamine
- 564 • 850852C 1,2-dioleoyl-sn-glycero-3-phosphoethanolamine-N,N-dimethyl
- 565 • 857130P 1-oleoyl-2-hydroxy-sn-glycero-3-phosphate (sodium salt)
- 566 • 857328P 1-oleoyl-sn-glycero-2,3-cyclic-phosphate (ammonium salt)
- 567 • 860053P total ganglioside extract (Brain, Porcine-Ammonium Salt)
- 568 • 860492 Sphingosine-1-phosphate; D-erythro-sphingosine-1-phosphate

569

570

- 571           • LIPOID (Heidelberg) has donated the following lipids:  
572  
573           • 30. 556200 Lipoid PC 14:0/14:0; 1,2-Dimyristoyl-sn-glycero-3-phosphatidylcholine  
574           (DMPC)  
575           • 31. 556300 Lipoid PC 16:0/16:0; 1,2-Dipalmitoyl-sn-glycero-3-phosphatidylcholine  
576           (DPPC)  
577           • 32. 556500 Lipoid PC 18:0/18:0; 1,2-Distearoyl-sn-glycero-3-phosphocholine (DSPC)  
578           • 33. 556600 Lipoid PC 18:1/18:1; 1,2-Dioleoyl-sn-glycero-3-phosphocholine (DOPC)  
579           • 34. 556400 Lipoid PC 16:0/18:1; 1-Palmitoyl-2-oleoyl-sn-glycero-3-phosphocholine  
580           (POPC)  
581           • 35. 557100 Lipoid PC 22:1/22:1; 1,2-Dierucoyl-sn-glycero-3-phosphocholine (DEPC)  
582           • 36. 566300 Lipoid PA 16:0/16:0; 1,2-Dipalmitoyl-sn-glycero-3-phosphate, mono-  
583           sodium salt (DPPA-Na)  
584           • 37. 567600 Lipoid PS 18:1/18:1; 1,2-Dioleoyl-sn-glycero-3-phosphoserine, sodium salt  
585           (DOPS-Na)  
586           • 38. 560200 Lipoid PG 14:0/14:0; 1,2-Dimyristoyl-sn-glycero-3-phospho-rac-glycerol-  
587           Na (DMPG)  
588           • 39. 560300 Lipoid PG 16:0/16:0; 1,2-Dipalmitoyl-sn-glycero-3-phospho-rac-glycerol-  
589           Na (DPPG)  
590           • 40. 560400 Lipoid PG 18:0/18:0; 1,2-Distearoyl-sn-glycero-3-phospho-rac-glycerol-Na  
591           (DSPG)  
592           • 41. 565600 Lipoid PE 14:0/14:0; 1,2-Dimyristoyl-sn-glycero-3-phosphoethanolamine  
593           (DMPE)  
594           • 42. 565300 Lipoid PE 16:0/16:0; 1,2-Dipalmitoyl-sn-glycero-3-phosphoethanolamine  
595           (DPPE)  
596           • 43. 565400 Lipoid PE 18:0/18:0; 1,2-Distearoyl-sn-glycero-3-phosphoethanolamine  
597           (DSPE)  
598           • 44. 565600 Lipoid PE 18:1/18:1; 1,2-Dioleoyl-sn-glycero-3-phosphoethanolamine  
599           (DOPE)  
600

601

602 Appendix table 2:

603

604 Effect of bulk lipids on Gs $\alpha$ -activated AC3 activity.

605

606 The molecular weights given by the vendor is list below the lipid class.

607 Numbers indicate ranges

608

609

| <b><u>mAC activities in HEK293 cell membranes transfected with human mAC3</u></b> |                                                                  |                                           |
|-----------------------------------------------------------------------------------|------------------------------------------------------------------|-------------------------------------------|
| hAC3, N=2-9                                                                       | <b><u>nmol cAMP•mg<sup>-1</sup>•min<sup>-1</sup> (range)</u></b> |                                           |
|                                                                                   | <b><u>+0.6 <math>\mu</math>M Gs<math>\alpha</math></u></b>       | <b><u>+10 <math>\mu</math>M Lipid</u></b> |
| <b>Egg L-<math>\alpha</math>-phosphatidic acid (MW 706)</b>                       | 0.88/0.85                                                        | 1.56/1.94                                 |
| <b>Egg L-<math>\alpha</math>-phosphatidylcholine (MW 770)</b>                     | 0.87/0.92                                                        | 0.80/0.86                                 |
| <b>Liver L-<math>\alpha</math>-phosphatidylcholine (MW 787)</b>                   | 0.3                                                              | 0.34                                      |
| <b>Brain Ganglioside (MW 1563)</b>                                                | 0.32/0.20                                                        | 0.16/0.37                                 |
| <b>Brain Sulfatides (MW 898)</b>                                                  | 0.25/0.23                                                        | 0.05/0.08                                 |
| <b>Brain Cerebrosides (MW 792)</b>                                                | 0.27                                                             | 0.28                                      |

610

611

612 Appendix Table 3 (basal and Gs $\alpha$ -activated mAC activities)

613

614

615

**mAC activities in HEK293 cell membranes**  
**transfected with human mAC isoforms**

617

618

619 nmol cAMP•mg<sup>-1</sup>•min<sup>-1</sup>

620

621 **basal activity**

**+ 0.6  $\mu$ M Gs $\alpha$**

622

623 HEK293 AC1 0.16 0.71 (4-fold)

624

625 HEK293 AC2 0.34 5.17 (15-fold)

626

627 HEK293 AC3 0.03 0.55 (16-fold)

628

629 HEK293 AC4 0.02 0.2 (9-fold)

630

631 HEK293 AC5 0.07 2.46 (37-fold)

632

633 HEK293 AC6 0.08 1.41 (18-fold)

634

635 HEK293 AC7 0.03 0.19 (7-fold)

636

637 HEK293 AC8 0.15 1.08 (7-fold)

638

639 HEK293 AC9 0.03 1.87 (71-fold)

640

641

642 n= 7-12

643

644

645 Appendix Figure 3

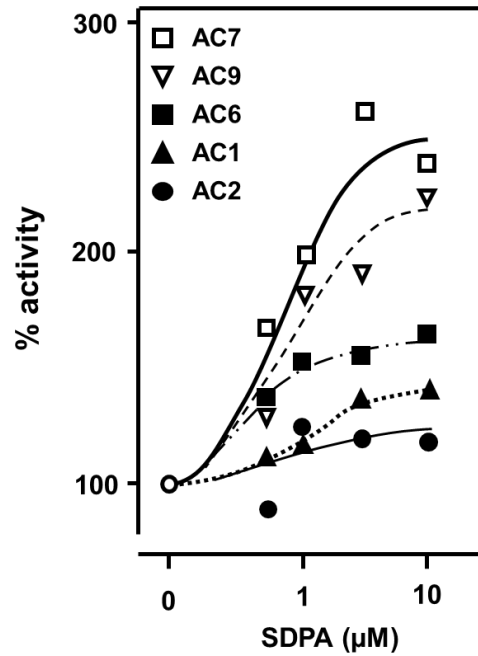

646

647

648 Concentration-response curves for SDPA potentiation of mAC isoforms 7, 9, 6, 1, and 2. Basal  
649 and Gsα-activated activities are listed in Appendix table 3.

650

651

652

653

654

655 **Appendix Figure 4:**

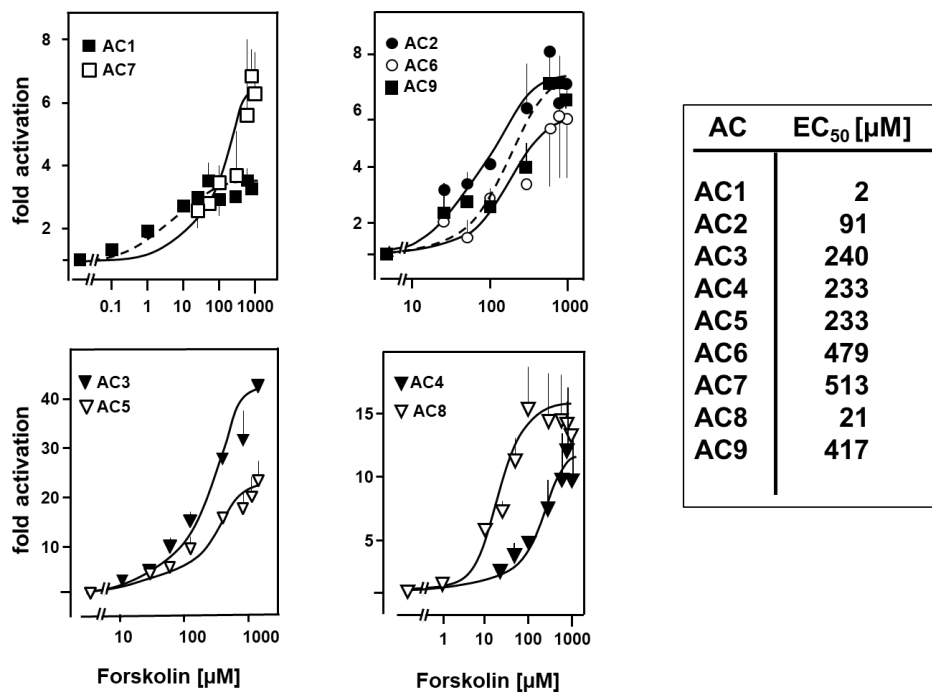

656

657

658 Forskolin concentration-response curves for the nine human mAC isoforms expressed in  
659 HEK293 cells. Error bars denote S.E.M. The calculated EC<sub>50</sub> concentrations are listed at right.

660



661 **Acknowledgements**

662 We thank U. Kurz for a continuous supply of G $\alpha$  (Q227L), Dr. V. Watts, for supplying us with  
663 HEK293 $\Delta$ mAC3 $\Delta$ mAC6 cells, and Prof. Dr. A. Lupas for continuous encouragement. We  
664 gratefully acknowledge constructive suggestions from Dr. J. Linder. Supported by the Deutsche  
665 Forschungsgemeinschaft and institutional funds from the Max-Planck-Society.

666

667  
668 **Competing interests:** None.

669

670 **Additional Information**

671

672 **Funding**

673

674 **Funder**                      **Grant reference number**                      **Author**

675

|                             |           |                  |
|-----------------------------|-----------|------------------|
| 676 Deutsche                |           |                  |
| 677 Forschungsgemeinschaft  | Sch275/45 | Marius Landau    |
| 678                         |           | Sherif Elsabbagh |
| 679 Max-Planck-Gesellschaft |           | Anubha Seth      |
| 680                         |           | Sherif Elsabbagh |

681

682 The funders had no role in study design, data collection and interpretation, or the decision to  
683 submit the work for publication.

684

685 Author contributions

686 AS, ML, AS, acquisition of data, analysis and interpretation of data; SE, transfection and culture  
687 of permanent HEK293 cell lines with human adenylyl cyclases , AS, ST, lipidomic analysis and  
688 interpretation of data, JES, conception and design, analysis and interpretation of data, design of  
689 figures, writing manuscript.

690

691

## 692 References

- 693 Baldwin TA, Li Y, Brand CS, Watts VJ, Dessauer CW (2019) Insights into the Regulatory Properties of  
694 Human Adenylyl Cyclase Type 9. *Mol Pharmacol* 95: 349-360
- 695 Bassler J, Schultz JE, Lupas AN (2018) Adenylate cyclases: Receivers, transducers, and generators of  
696 signals. *Cell Signaling* 46: 135-144
- 697 Beltz S, Bassler J, Schultz JE (2016) Regulation by the quorum sensor from *Vibrio* indicates a receptor  
698 function for the membrane anchors of adenylate cyclases. *Elife* 5
- 699 Bligh EG, Dyer WJ (1959) A rapid method of total lipid extraction and purification. *Can J Biochem Physiol*  
700 37: 911-7
- 701 Cater RJ, Chua GL, Erramilli SK, Keener JE, Choy BC, Tokarz P, Chin CF, Quek DQY, Kloss B, Pepe JG, Parisi  
702 G, Wong BH, Clarke OB, Marty MT, Kossiakoff AA, Khelashvili G, Silver DL, Mancina F (2021) Structural  
703 basis of omega-3 fatty acid transport across the blood-brain barrier. *Nature* 595: 315-319
- 704 Cumbay MG, Watts VJ (2004) Novel regulatory properties of human type 9 adenylate cyclase. *J*  
705 *Pharmacol Exp Ther* 310: 108-15
- 706 Dessauer CW, Watts VJ, Ostrom RS, Conti M, Dove S, Seifert R (2017) International Union of Basic and  
707 Clinical Pharmacology. Cl. Structures and Small Molecule Modulators of Mammalian Adenylyl Cyclases.  
708 *Pharmacol Rev* 69: 93-139
- 709 Diel S, Klass K, Wittig B, Kleuss C (2006) Gbetagamma activation site in adenylyl cyclase type II. Adenylyl  
710 cyclase type III is inhibited by Gbetagamma. *J Biol Chem* 281: 288-294
- 711 Duan J, Song Y, Zhang X, Wang C (2021) Effect of omega-3 Polyunsaturated Fatty Acids-Derived Bioactive  
712 Lipids on Metabolic Disorders. *Front Physiol* 12: 646491
- 713 Graziano MP, Freissmuth M, Gilman AG (1989) Expression of Gs alpha in *Escherichia coli*. Purification and  
714 properties of two forms of the protein. *J Biol Chem* 264: 409-18
- 715 Graziano MP, Freissmuth M, Gilman AG (1991) Purification of recombinant Gs alpha. *Methods Enzymol*  
716 195: 192-202
- 717 Guo YL, Seebacher T, Kurz U, Linder JU, Schultz JE (2001) Adenylyl cyclase Rv1625c of *Mycobacterium*  
718 *tuberculosis*: a progenitor of mammalian adenylyl cyclases. *EMBO J* 20: 3667-3675
- 719 Heras-Sandoval D, Pedraza-Chaverri J, Perez-Rojas JM (2016) Role of docosahexaenoic acid in the  
720 modulation of glial cells in Alzheimer's disease. *J Neuroinflammation* 13: 61
- 721 Hishikawa D, Valentine WJ, Iizuka-Hishikawa Y, Shindou H, Shimizu T (2017) Metabolism and functions of  
722 docosahexaenoic acid-containing membrane glycerophospholipids. *FEBS Lett* 591: 2730-2744
- 723 Jang JH, Lee CS, Hwang D, Ryu SH (2012) Understanding of the roles of phospholipase D and phosphatidic  
724 acid through their binding partners. *Prog Lipid Res* 51: 71-81
- 725 Kanacher T, Schultz A, Linder JU, Schultz JE (2002) A GAF-domain-regulated adenylyl cyclase from  
726 *Anabaena* is a self-activating cAMP switch. *EMBO Journal* 21: 3672-3680
- 727 Kooijman EE, Burger KN (2009) Biophysics and function of phosphatidic acid: a molecular perspective.  
728 *Biochim Biophys Acta* 1791: 881-8
- 729 Linder JU, Schultz JE (2003) The class III adenylyl cyclases: multi-purpose signalling modules. *Cell Signal*  
730 15: 1081-1089
- 731 Lu Q, Murakami C, Murakami Y, Hoshino F, Asami M, Usuki T, Sakai H, Sakane F (2020) 1-Stearoyl-2-  
732 docosahexaenoyl-phosphatidic acid interacts with and activates Praja-1, the E3 ubiquitin ligase acting on  
733 the serotonin transporter in the brain. *FEBS Lett* 594: 1787-1796
- 734 Ludwig MG, Seuwen K (2002) Characterization of the human adenylyl cyclase gene family: cDNA, gene  
735 structure, and tissue distribution of the nine isoforms. *J Recept Signal Transduct Res* 22: 79-110
- 736 Matyash V, Liebisch G, Kurzchalia TV, Shevchenko A, Schwudke D (2008) Lipid extraction by methyl-tert-  
737 butyl ether for high-throughput lipidomics. *J Lipid Res* 49: 1137-46
- 738 Ng WL, Wei Y, Perez LJ, Cong J, Long T, Koch M, Semmelhack MF, Wingreen NS, Bassler BL (2010) Probing  
739 bacterial transmembrane histidine kinase receptor-ligand interactions with natural and synthetic

740 molecules. *Proceedings of the National Academy of Sciences of the United States of America* 107: 5575-  
741 80

742 Nguyen LN, Ma D, Shui G, Wong P, Cazenave-Gassiot A, Zhang X, Wenk MR, Goh EL, Silver DL (2014)  
743 Mfsd2a is a transporter for the essential omega-3 fatty acid docosahexaenoic acid. *Nature* 509: 503-6

744 Ostrom KF, LaVigne JE, Brust TF, Seifert R, Dessauer CW, Watts VJ, Ostrom RS (2022) Physiological roles  
745 of mammalian transmembrane adenylyl cyclase isoforms. *Physiol Rev* 102: 815-857

746 Pinto C, Papa D, Hubner M, Mou TC, Lushington GH, Seifert R (2008) Activation and inhibition of adenylyl  
747 cyclase isoforms by forskolin analogs. *J Pharmacol Exp Ther* 325: 27-36

748 Premont RT, Matsuoka I, Mattei MG, Pouille Y, Defer N, Hanoune J (1996) Identification and  
749 characterization of a widely expressed form of adenylyl cyclase. *J Biol Chem* 271: 13900-7

750 Robinson CV, Rohacs T, Hansen SB (2019) Tools for Understanding Nanoscale Lipid Regulation of Ion  
751 Channels. *Trends Biochem Sci* 44: 795-806

752 Sadana R, Dessauer CW (2009) Physiological roles for G protein-regulated adenylyl cyclase isoforms:  
753 insights from knockout and overexpression studies. *Neurosignals* 17: 5-22

754 Sanabra C, Mengod G (2011) Neuroanatomical distribution and neurochemical characterization of cells  
755 expressing adenylyl cyclase isoforms in mouse and rat brain. *J Chem Neuroanat* 41: 43-54

756 Schultz JE, Natarajan J (2013) Regulated unfolding: a basic principle of intraprotein signaling in modular  
757 proteins. *Trends Biochem Sci* 38: 538-45

758 Schultz JE, Schmidt BH (1987) Treatment of rats with thyrotropin (TSH) reduces the adrenoceptor  
759 sensitivity of adenylyl cyclase from cerebral cortex. *Neurochem Int* 10: 173-8

760 Seth A, Finkbeiner M, Grischin J, Schultz JE (2020) G $\alpha$  stimulation of mammalian adenylyl cyclases  
761 regulated by their hexahelical membrane anchors. *Cell Signal* 68: 109538

762 Sinha SC, Sprang SR (2006) Structures, mechanism, regulation and evolution of class III nucleotidyl  
763 cyclases. *Rev Physiol Biochem Pharmacol* 157: 105-40

764 Soto-Velasquez M, Hayes MP, Alpsoy A, Dykhuizen EC, Watts VJ (2018) A Novel CRISPR/Cas9-Based  
765 Cellular Model to Explore Adenylyl Cyclase and cAMP Signaling. *Mol Pharmacol* 94: 963-972

766 Sunahara RK, Taussig R (2002) Isoforms of mammalian adenylyl cyclase: multiplicities of signaling. *Mol*  
767 *Interv* 2: 168-84

768 Tang WJ, Gilman AG (1995) Construction of a soluble adenylyl cyclase activated by G $\alpha$  and  
769 forskolin. *Science* 268: 1769-72

770 Tesmer JJ, Sprang SR (1998) The structure, catalytic mechanism and regulation of adenylyl cyclase.  
771 *Current opinion in structural biology* 8: 713-719

772 Tesmer JJ, Sunahara RK, Gilman AG, Sprang SR (1997) Crystal structure of the catalytic domains of  
773 adenylyl cyclase in a complex with G $\alpha$ .GTP $\gamma$ S. *Science* 278: 1907-16

774 Vvedenskaya O, Rose TD, Knittelfelder O, Palladini A, Wodke JAH, Schuhmann K, Ackerman JM, Wang Y,  
775 Has C, Brosch M, Thangapandi VR, Buch S, Zullig T, Hartler J, Kofeler HC, Rocken C, Coskun U, Klipp E, von  
776 Schoenfels W, Gross J et al. (2021) Nonalcoholic fatty liver disease stratification by liver lipidomics. *J Lipid*  
777 *Res* 62: 100104

778 Zhang G, Liu Y, Ruoho AE, Hurley JH (1997) Structure of the adenylyl cyclase catalytic core. *Nature* 386:  
779 247-53

780 Zhu Z, Tan Z, Li Y, Luo H, Hu X, Tang M, Hescheler J, Mu Y, Zhang L (2015) Docosahexaenoic acid alters  
781 G $\alpha$  localization in lipid raft and potentiates adenylyl cyclase. *Nutrition* 31: 1025-30

782 Ziegler M, Bassler J, Beltz S, Schultz A, Lupas AN, Schultz JE (2017) A novel signal transducer element  
783 intrinsic to class IIIa and IIIb adenylyl cyclases. *FEBS J* 284: 1204-1217

784
